# Supplementary material for: Statistical and Machine Learning Models for Classification of Human Wear and Delivery Days in Accelerometry Data
Source: PubMed Central journal article supplement (PMC8069625; doi:10.3390/s21082726), 2021-04-13
Supplement: sensors-21-02726-s001.pdf [file sensors-21-02726-s001.pdf]

Article

# Statistical and Machine Learning Models for Classification of Human Wear and Delivery Days in Accelerometry Data

Ryan Moore <sup>1</sup>, Kristin R. Archer <sup>2,3</sup> and Leena Choi <sup>1,\*</sup>

<sup>1</sup> Department of Biostatistics, Vanderbilt University Medical Center, Nashville, TN 37232, USA; ryan.moore@vumc.org

<sup>2</sup> Department of Orthopaedic Surgery, Center for Musculoskeletal Research, Vanderbilt University Medical Center, Nashville, TN 37232, USA; kristin.archer@vumc.org

<sup>3</sup> Department of Physical Medicine & Rehabilitation, Osher Center for Integrative Medicine, Vanderbilt University Medical Center, Nashville, TN 37232, USA

\* Correspondence: leena.choi@vumc.org; Tel.: +1-615-343-3497

**Table S1.** Architecture of multi-layer perceptron neural network.

| Layer        | Layer Hyperparameters | Activation Function | Output Shape |
|--------------|-----------------------|---------------------|--------------|
| Dense        | 200 Neurons           | ReLU                | (,200)       |
| Dropout      | 50% Dropout Rate      |                     | (,200)       |
| Dense Output | 1 Neuron              | Sigmoid             | (,1)         |

**Table S2.** Architecture of 1-D convolutional neural network.

| Layer        | Layer Hyperparameters | Activation Function | Output Shape |
|--------------|-----------------------|---------------------|--------------|
| LSTM         | 30 Neurons            | TanH and Sigmoid    | (,30)        |
| Dropout      | 40% Dropout Rate      |                     | (,30)        |
| Dense        | 100 Neurons           | ReLU                | (,100)       |
| Dropout      | 30% Dropout Rate      |                     | (,100)       |
| Dense Output | 1 Neuron              | Sigmoid             | (,1)         |

**Table S3.** Architecture of long short-term memory (LSTM) recurrent neural network.

| Layer         | Layer Hyperparameters | Activation Function | Output Shape |
|---------------|-----------------------|---------------------|--------------|
| Convolutional | 200 5 × 3 Filters     | ReLU                | (,1431,200)  |
| Max Pooling   | 4 Unit Pool Size      |                     | (,357,200)   |
| Convolutional | 64 5 × 1 Filters      | ReLU                | (,355,64)    |
| LSTM          | 30 Neurons            | TanH and Sigmoid    | (,30)        |
| Dropout       | 30% Dropout Rate      |                     | (,30)        |
| Dense Output  | 1 Neuron              | Sigmoid             | (,1)         |

**Citation:** Moore, R.; Archer, K.R.; Choi, L. Statistical and Machine Learning Models for Classification of Human Wear and Delivery Days in Accelerometry Data. *Sensors* **2021**, *21*, 272. <https://doi.org/10.3390/s21082726>

Academic Editor: Ki H. Chon

Received: 12 March 2021

Accepted: 9 April 2021

Published: 13 April 2021

**Publisher’s Note:** MDPI stays neutral with regard to jurisdictional claims in published maps and institutional affiliations.

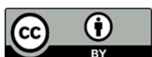

**Copyright:** © 2021 by the authors. Submitted for possible open access publication under the terms and conditions of the Creative Commons Attribution (CC BY) license (<http://creativecommons.org/licenses/by/4.0/>).

**Table S4.** Architecture of convolutional long short-term memory (LSTM) neural network.

| <b>Model</b>                           | <b>Sensitivity</b> | <b>PPV</b>    | <b>F1 Score</b> | <b>Brier Score</b> |
|----------------------------------------|--------------------|---------------|-----------------|--------------------|
| <i>Minimally Processed Dataset</i>     |                    |               |                 |                    |
| Feature Input Models                   |                    |               |                 |                    |
| Random Forest                          | 0.981 (0.008)      | 0.931 (0.006) | 0.955 (0.006)   | 0.041 (0.004)      |
| Generalized Linear Model               | 0.984 (0.002)      | 0.931 (0.004) | 0.957 (0.002)   | 0.041 (0.002)      |
| Generalized Mixed Effects Model        | 0.944 (0.040)      | 0.889 (0.033) | 0.916 (0.036)   | 0.066 (0.019)      |
| Multilayer Perceptron                  | 0.981 (0.004)      | 0.927 (0.004) | 0.953 (0.004)   | 0.043 (0.003)      |
| Scaled Data Input Models               |                    |               |                 |                    |
| Convolutional Neural Network           | 0.980 (0.003)      | 0.926 (0.012) | 0.952 (0.007)   | 0.044 (0.008)      |
| Recurrent Neural Network               | 0.936 (0.055)      | 0.741 (0.163) | 0.815 (0.090)   | 0.221 (0.190)      |
| Convolutional Recurrent Neural Network | 0.988 (0.005)      | 0.936 (0.006) | 0.961 (0.005)   | 0.038 (0.004)      |

**Table S5.** Average model performance metrics from 5-fold Monte Carlo cross-validation with standard deviation in parentheses for the minimally and fully processed data. PPV: Positive Predictive Value.

|                                        |               |               |               |               |
|----------------------------------------|---------------|---------------|---------------|---------------|
| <i>Fully Processed Dataset</i>         |               |               |               |               |
| Feature Input Models                   |               |               |               |               |
| Random Forest                          | 0.970 (0.007) | 0.944 (0.004) | 0.957 (0.005) | 0.023 (0.001) |
| Generalized Linear Model               | 0.964 (0.005) | 0.937 (0.006) | 0.951 (0.005) | 0.026 (0.003) |
| Generalized Mixed Effects Model        | 0.966 (0.007) | 0.935 (0.008) | 0.950 (0.006) | 0.027 (0.004) |
| Multilayer Perceptron                  | 0.958 (0.005) | 0.933 (0.005) | 0.945 (0.005) | 0.028 (0.002) |
| Scaled Data Input Models               |               |               |               |               |
| Convolutional Neural Network           | 0.962 (0.015) | 0.938 (0.009) | 0.950 (0.010) | 0.026 (0.004) |
| Recurrent Neural Network               | 0.915 (0.047) | 0.839 (0.068) | 0.873 (0.035) | 0.074 (0.040) |
| Convolutional Recurrent Neural Network | 0.970 (0.008) | 0.949 (0.006) | 0.960 (0.006) | 0.021 (0.002) |
